# Supplementary material for: Whole genome sequencing of Chinese clearhead icefish, Protosalanx hyalocranius
Source: PubMed Central journal article supplement (PMC5530312; doi:10.1093/gigascience/giw012), 2017-02-24
Supplement: giw012_Resposne_to_Reviewer_Comment_Revision_2.pdf [file giw012_Resposne_to_Reviewer_Comment_Revision_2.pdf]

Nov.17th, 2016

RE: Your submission to GigaScience - GIGA-D-16-00073

Dear editor Hans,

Thanks for your letter. We made revisions based on your suggestions.

We added the detailed table (Table 3: Gene annotation statistics of the genome of *P. hyalocranius*.) to demonstrate the annotation result in each step containing the denovo annotation (AUGUSTUS and GENSCAN), homolog annotation and Glean process.

Best regards,  
Qiong Shi, PhD, Professor  
BGI  
Shenzhen 518083  
China
